# Supplementary material for: High density linkage disequilibrium maps of chromosome 14 in Holstein and Angus cattle
Source: PubMed Central journal article supplement (PMC2478670; doi:10.1186/1471-2156-9-45), 2008-07-08

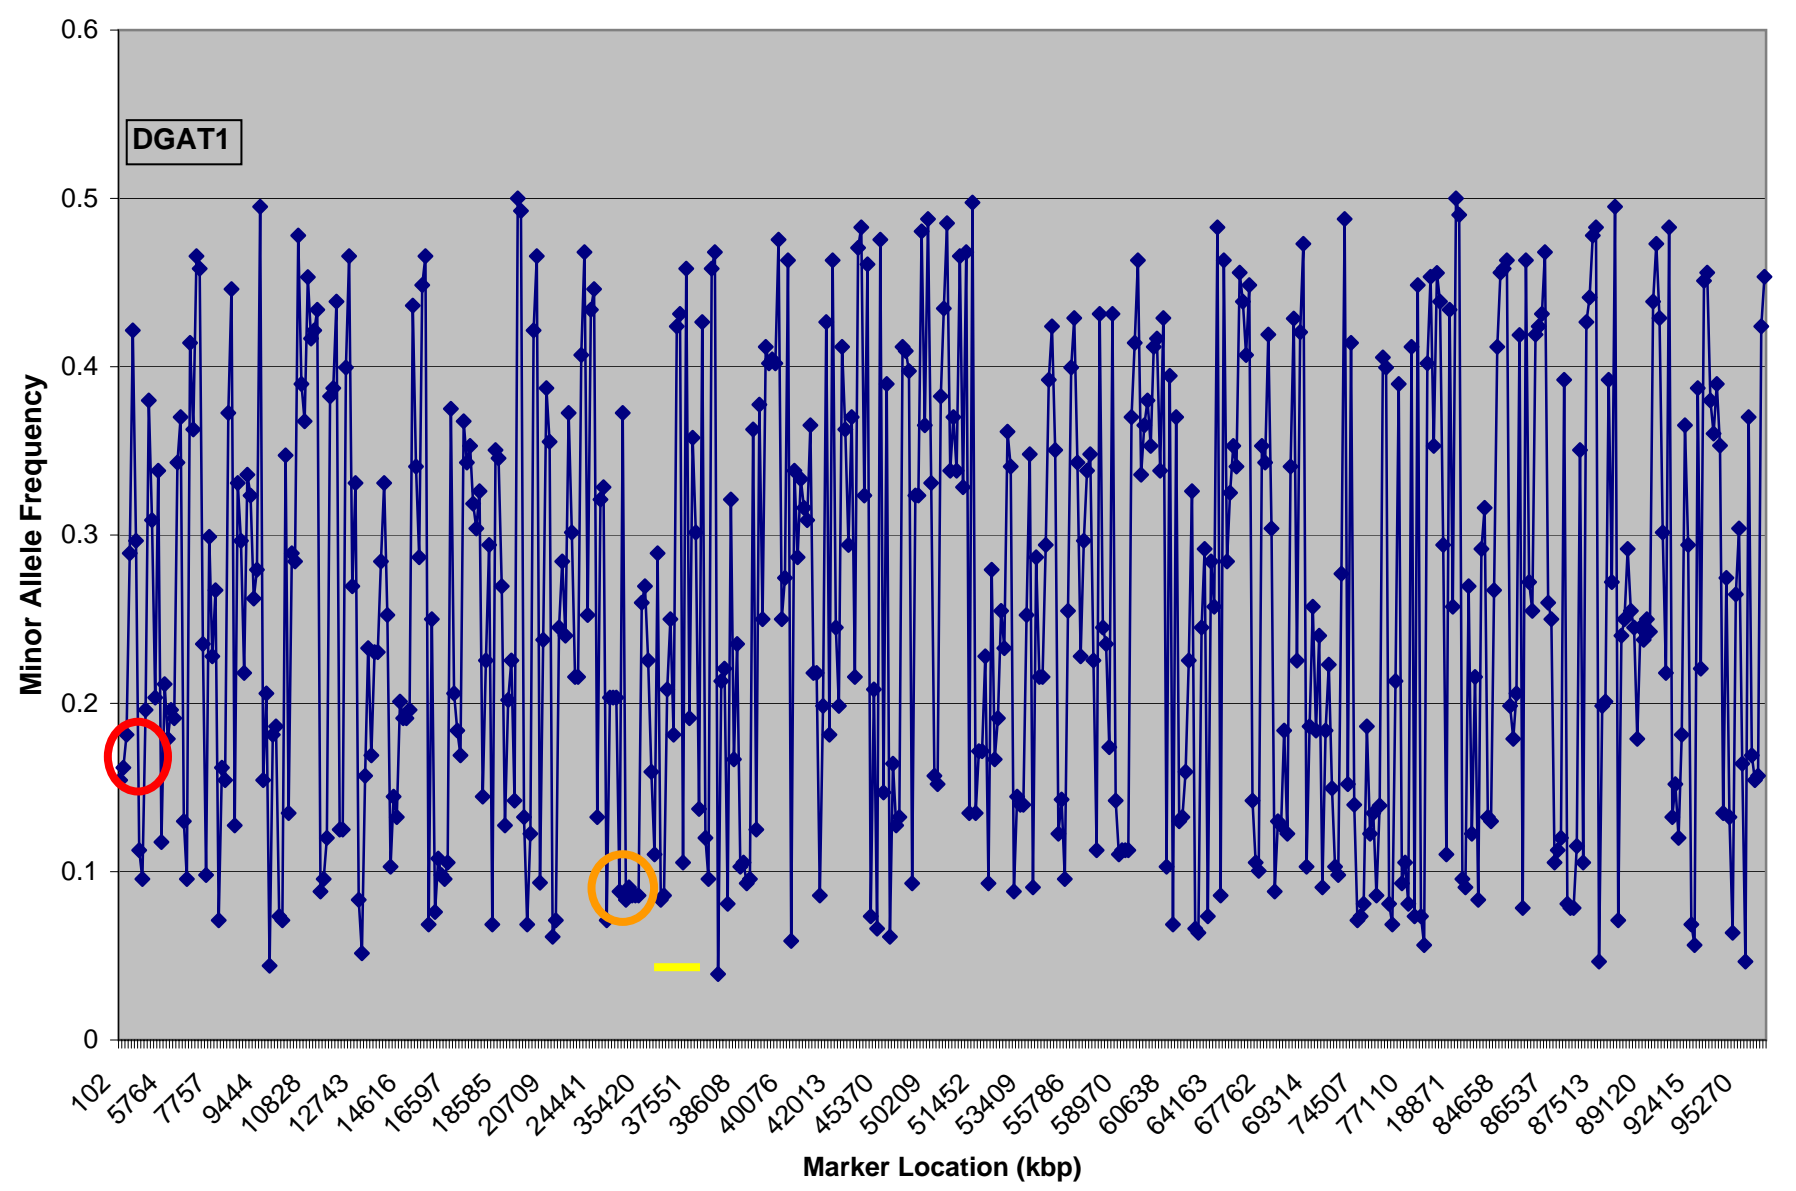

Supplement: 1471-2156-9-45-S5.pdf [file 1471-2156-9-45-S5.pdf]
